# Supplementary material for: Structural Phase Transitions in the Double Salts (NH4)2PO3F·NH4NO3 and (NH4)2XO4·3NH4NO3 (X = Se, Cr)
Source: MDPI journal article supplement (doi:10.3390/inorganics11110433), 2023-11-08
Supplement: s1 [file s1]

# Structural phase transitions in the double salts $(\text{NH}_4)_2\text{PO}_3\text{F}\cdot\text{NH}_4\text{NO}_3$ and $(\text{NH}_4)_2\text{XO}_4\cdot 3\text{NH}_4\text{NO}_3$ ( $X = \text{Se}, \text{Cr}$ )

Matthias Weil <sup>1,\*</sup>, Thomas Häusler <sup>1</sup>, Barbara Bonneau <sup>2</sup> and Ekkehard Füglein <sup>3</sup>

<sup>1</sup> Institute for Chemical Technologies and Analytics, Division of Structural Chemistry, TU Wien,  
Getreidemarkt 9/E164-05-1, 1060 Vienna, Austria

<sup>2</sup> IUT Bordeaux, 15 Rue Naudet, 33175 Gradignan, France

<sup>3</sup> Netzsch-Gerätebau GmbH, Wittelsbacherstr. 42, 95100 Selb, Germany

\* Correspondence: matthias.weil@tuwien.ac.at

## Supplementary materials

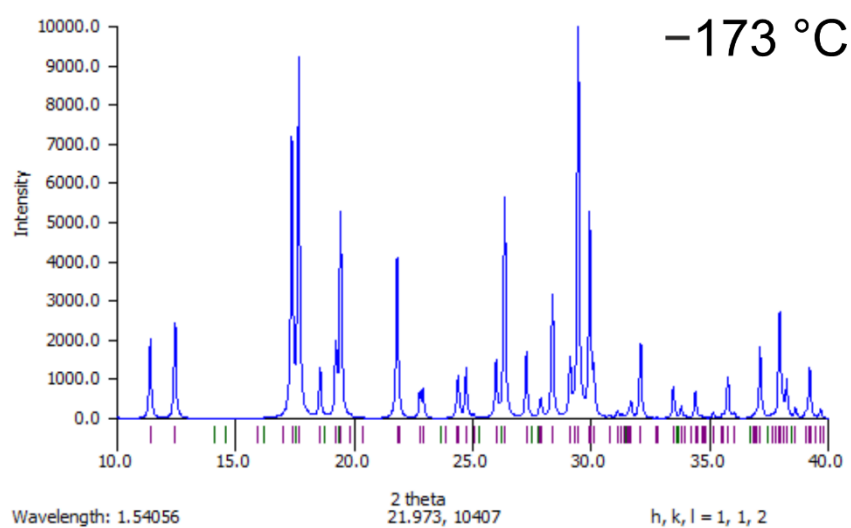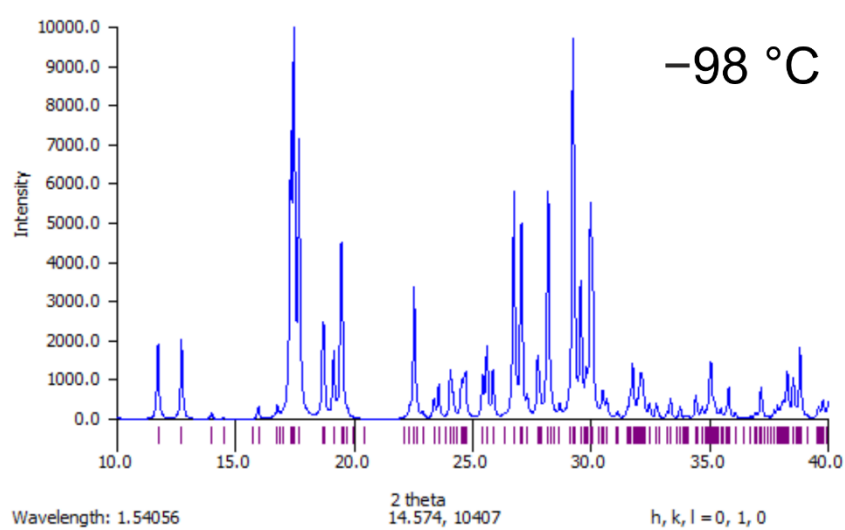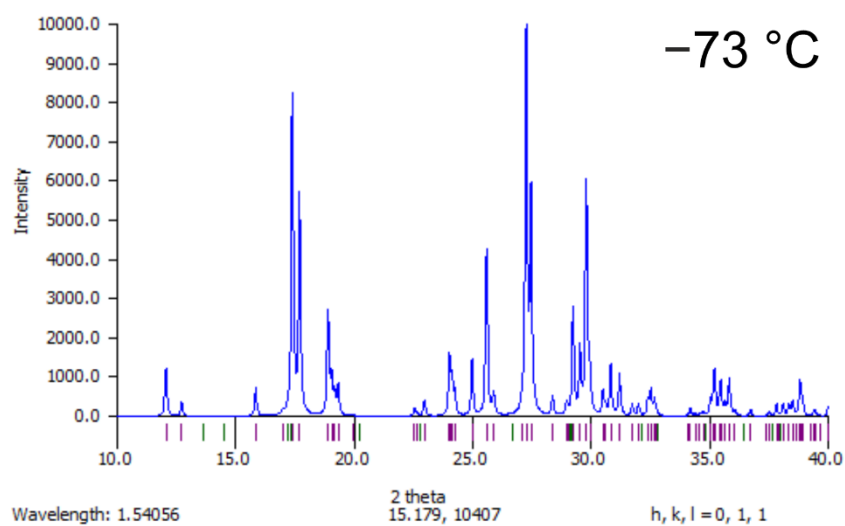

**Figure S1.** PXRD simulations based on single-crystal data for the different  $(\text{NH}_4)_2\text{PO}_3\text{F} \cdot \text{NH}_4\text{NO}_3$  polymorphs.

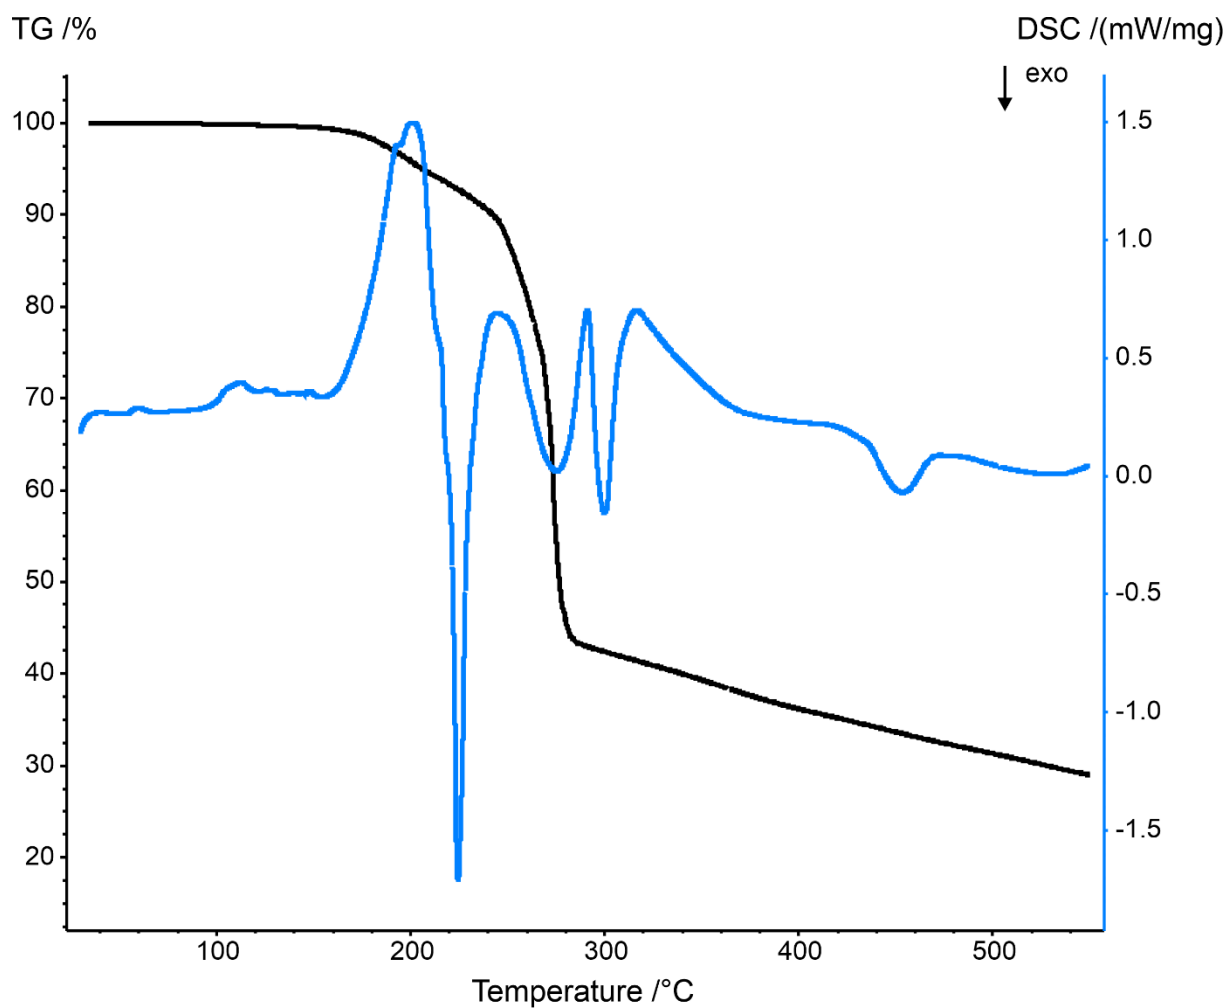

**Figure S2.** TG curve (black) and DSC curve (blue) of  $(\text{NH}_4)_2\text{PO}_3\text{F} \cdot \text{NH}_4\text{NO}_3\text{-(I)}$  in the temperature range 30–550 °C.

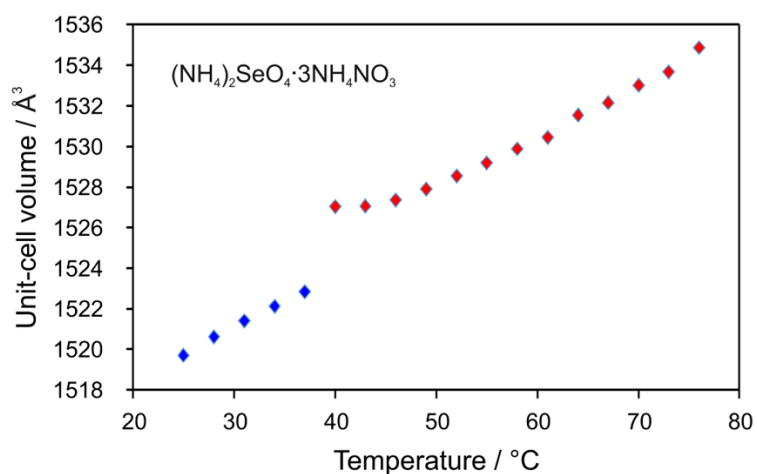

**Figure S3.** Evolution of the refined unit cell volume (Rietveld method) of  $(\text{NH}_4)_2\text{SeO}_4 \cdot 3\text{NH}_4\text{NO}_3$  across the phase transition between 37 °C and 40 °C. Blue symbols represent polymorph-(I), red symbols polymorph-(II). For better comparison, the unit cell volume of polymorph-(II) was doubled.

**Table S1.** Data collection and refinement details of (NH<sub>4</sub>)<sub>2</sub>PO<sub>3</sub>F·NH<sub>4</sub>NO<sub>3</sub>-(I) at 22 °C.

|                                                                              |                     |
|------------------------------------------------------------------------------|---------------------|
| $M_r$                                                                        | 214.11              |
| Space group, No                                                              | $P2_1/n$ , 14       |
| $Z$                                                                          | 4                   |
| Crystal form, color                                                          | plate, colourless   |
| Crystal dimension / mm <sup>3</sup>                                          | 0.55 × 0.45 × 0.10  |
| $a$ / Å                                                                      | 10.2455(13)         |
| $b$ / Å                                                                      | 6.0600(9)           |
| $c$ / Å                                                                      | 14.590(2)           |
| $\alpha$ / °                                                                 | 90                  |
| $\beta$ / °                                                                  | 104.077(4)          |
| $\gamma$ / °                                                                 | 90                  |
| $V$ / Å <sup>3</sup>                                                         | 878.7(2)            |
| X-ray density /g·cm <sup>-3</sup>                                            | 1.619               |
| Radiation type                                                               | Mo $K\alpha$        |
| $\mu$ / mm <sup>-1</sup>                                                     | 0.338               |
| $T_{\min}$ , $T_{\max}$                                                      | 0.674, 0.746        |
| No. of measured, independent and observed [ $I > 2\sigma(I)$ ] reflections   | 42981, 3131, 2562   |
| $R_{\text{int}}$                                                             | 0.0398              |
| $(\sin \theta/\lambda)_{\max}$ / Å <sup>-1</sup>                             | 0.818               |
| No. of reflections                                                           | 3131                |
| No. of parameters                                                            | 147                 |
| $R[F^2 > 2\sigma(F^2)]$ , $wR(F^2)$ , $S$                                    | 0.034, 0.1023, 1.05 |
| $\Delta\rho_{\max}$ , $\Delta\rho_{\min}$ (e <sup>-</sup> ·Å <sup>-3</sup> ) | 0.40, -0.36         |
| CSD-code                                                                     | 2294150             |

**Table S2.** Data collection and refinement details of (NH<sub>4</sub>)<sub>2</sub>SeO<sub>4</sub>·3NH<sub>4</sub>NO<sub>3</sub>-(II) at different temperatures.

|                                                                                                                | -23 °C                                  | -73 °C                                  | -123 °C                                 |
|----------------------------------------------------------------------------------------------------------------|-----------------------------------------|-----------------------------------------|-----------------------------------------|
| <i>M<sub>r</sub></i>                                                                                           | 419.20                                  | 419.20                                  | 419.20                                  |
| Space group, No                                                                                                | <i>P</i> 2 <sub>1</sub> / <i>c</i> , 14 | <i>P</i> 2 <sub>1</sub> / <i>c</i> , 14 | <i>P</i> 2 <sub>1</sub> / <i>c</i> , 14 |
| <i>Z</i>                                                                                                       | 4                                       | 4                                       | 4                                       |
| Crystal form, color                                                                                            | plate, colourless                       | plate, colourless                       | plate, colourless                       |
| Crystal dimension / mm <sup>3</sup>                                                                            | 0.30 × 0.20 × 0.05                      | 0.30 × 0.20 × 0.05                      | 0.08 × 0.08 × 0.05                      |
| <i>a</i> / Å                                                                                                   | 10.0678(5)                              | 10.0580(13)                             | 10.0493(7)                              |
| <i>b</i> / Å                                                                                                   | 6.0089(3)                               | 6.0210(9)                               | 6.0481(5)                               |
| <i>c</i> / Å                                                                                                   | 24.9034(13)                             | 24.743(4)                               | 24.4978(19)                             |
| <i>α</i> / °                                                                                                   | 90                                      | 90                                      | 90                                      |
| <i>β</i> / °                                                                                                   | 92.745(2)                               | 92.858(4)                               | 93.058(2)                               |
| <i>γ</i> / °                                                                                                   | 90                                      | 90                                      | 90                                      |
| <i>V</i> / Å <sup>3</sup>                                                                                      | 1504.84(13)                             | 1496.5(4)                               | 1486.8(2)                               |
| X-ray density / g·cm <sup>-3</sup>                                                                             | 1.850                                   | 1.861                                   | 1.873                                   |
| Radiation type                                                                                                 | Mo <i>Kα</i>                            | Mo <i>Kα</i>                            | Mo <i>Kα</i>                            |
| <i>μ</i> / mm <sup>-1</sup>                                                                                    | 2.579                                   | 2.593                                   | 2.610                                   |
| <i>T</i> <sub>min</sub> , <i>T</i> <sub>max</sub>                                                              | 0.691, 0.765                            | 0.689, 0.786                            | 0.818, 0.974                            |
| No. of measured, independent and observed [ <i>I</i> > 2σ( <i>I</i> )] reflections                             | 74830, 6661, 5149                       | 80351, 6636, 5348                       | 73401, 6558, 5654                       |
| <i>R</i> <sub>int</sub>                                                                                        | 0.0442                                  | 0.0480                                  | 0.0400                                  |
| (sin <i>θ</i> / <i>λ</i> ) <sub>max</sub> / Å <sup>-1</sup>                                                    | 0.819                                   | 0.819                                   | 0.818                                   |
| No. of reflections                                                                                             | 6661                                    | 6636                                    | 6558                                    |
| No. of parameters                                                                                              | 316                                     | 260                                     | 260                                     |
| <i>R</i> [ <i>F</i> <sup>2</sup> > 2σ( <i>F</i> <sup>2</sup> )], <i>wR</i> ( <i>F</i> <sup>2</sup> ), <i>S</i> | 0.031, 0.070, 1.08                      | 0.039, 0.096, 1.04                      | 0.028, 0.065, 1.06                      |
| Δ <i>Q</i> <sub>max</sub> , Δ <i>Q</i> <sub>min</sub> (e <sup>-</sup> ·Å <sup>-3</sup> )                       | 0.57, -0.40                             | 1.67, -1.55                             | 1.28, -0.80                             |
| CSD-code                                                                                                       | 2294153                                 | 2294154                                 | 2294156                                 |

**Table S3.** Data collection and refinement details of (NH<sub>4</sub>)<sub>2</sub>CrO<sub>4</sub>·3NH<sub>4</sub>NO<sub>3</sub>-(II) at different temperatures.

|                                                                                                                | -23 °C                                  | -73 °C                                  | -123 °C                                 |
|----------------------------------------------------------------------------------------------------------------|-----------------------------------------|-----------------------------------------|-----------------------------------------|
| <i>M<sub>r</sub></i>                                                                                           | 392.24                                  | 392.24                                  | 392.24                                  |
| Space group, No                                                                                                | <i>P</i> 2 <sub>1</sub> / <i>c</i> , 14 | <i>P</i> 2 <sub>1</sub> / <i>c</i> , 14 | <i>P</i> 2 <sub>1</sub> / <i>c</i> , 14 |
| <i>Z</i>                                                                                                       | 4                                       | 4                                       | 4                                       |
| Crystal form, color                                                                                            | plate, yellow                           | plate, yellow                           | plate, yellow                           |
| Crystal dimension / mm <sup>3</sup>                                                                            | 0.08 × 0.08 × 0.01                      | 0.30 × 0.20 × 0.05                      | 0.08 × 0.08 × 0.01                      |
| <i>a</i> / Å                                                                                                   | 10.0139(17)                             | 10.0009(7)                              | 9.9715(11)                              |
| <i>b</i> / Å                                                                                                   | 5.9360(10)                              | 5.9349(4)                               | 5.9252(7)                               |
| <i>c</i> / Å                                                                                                   | 25.033(4)                               | 24.9469(18)                             | 24.870(3)                               |
| <i>α</i> / °                                                                                                   | 90                                      | 90                                      | 90                                      |
| <i>β</i> / °                                                                                                   | 92.431(4)                               | 92.480(2)                               | 92.528(2)                               |
| <i>γ</i> / °                                                                                                   | 90                                      | 90                                      | 90                                      |
| <i>V</i> / Å <sup>3</sup>                                                                                      | 1486.7(4)                               | 1479.32(18)                             | 1468.0(3)                               |
| X-ray density / g·cm <sup>-3</sup>                                                                             | 1.752                                   | 1.761                                   | 1.775                                   |
| Radiation type                                                                                                 | Mo <i>Kα</i>                            | Mo <i>Kα</i>                            | Mo <i>Kα</i>                            |
| <i>μ</i> / mm <sup>-1</sup>                                                                                    | 0.853                                   | 0.858                                   | 0.864                                   |
| <i>T</i> <sub>min</sub> , <i>T</i> <sub>max</sub>                                                              | 0.653, 0.772                            | 0.656, 0.755                            | 0.647, 0.767                            |
| No. of measured, independent and observed [ <i>I</i> > 2σ( <i>I</i> )] reflections                             | 44963, 4335, 2852                       | 59486, 6413, 4028                       | 44438, 4273, 3346                       |
| <i>R</i> <sub>int</sub>                                                                                        | 0.0686                                  | 0.0780                                  | 0.0558                                  |
| (sin <i>θ</i> /λ) <sub>max</sub> / Å <sup>-1</sup>                                                             | 0.703                                   | 0.805                                   | 0.703                                   |
| No. of reflections                                                                                             | 4335                                    | 6413                                    | 4273                                    |
| No. of parameters                                                                                              | 288                                     | 288                                     | 288                                     |
| <i>R</i> [ <i>F</i> <sup>2</sup> > 2σ( <i>F</i> <sup>2</sup> )], <i>wR</i> ( <i>F</i> <sup>2</sup> ), <i>S</i> | 0.042, 0.126, 1.04                      | 0.043, 0.122, 1.01                      | 0.035, 0.098, 1.04                      |
| Δ <i>Q</i> <sub>max</sub> , Δ <i>Q</i> <sub>min</sub> (e <sup>-</sup> ·Å <sup>-3</sup> )                       | 0.62, -0.45                             | 0.73, -0.63                             | 0.96, -0.44                             |
| CSD-code                                                                                                       | 2294158                                 | 2294160                                 | 2294152                                 |

**Table S4.** Selected bond lengths and interactions /Å of (NH<sub>4</sub>)<sub>2</sub>PO<sub>3</sub>F·NH<sub>4</sub>NO<sub>3</sub>-(II) at 22 °C and of (NH<sub>4</sub>)<sub>2</sub>XO<sub>4</sub>·3NH<sub>4</sub>NO<sub>3</sub>-(II) at different temperatures.

|                                                                                               |            |         |            |
|-----------------------------------------------------------------------------------------------|------------|---------|------------|
| <b>(NH<sub>4</sub>)<sub>2</sub>PO<sub>3</sub>F·NH<sub>4</sub>NO<sub>3</sub>-(II) at 22 °C</b> |            |         |            |
| P1—O2                                                                                         | 1.4952(9)  | N1—O5   | 1.241(2)   |
| P1—O3                                                                                         | 1.5035(9)  | N1—O4   | 1.2443(19) |
| P1—O1                                                                                         | 1.5067(9)  | N1—O6   | 1.2442(19) |
| P1—F1                                                                                         | 1.5946(9)  |         |            |
| <b>(NH<sub>4</sub>)<sub>2</sub>SeO<sub>4</sub>·3NH<sub>4</sub>NO<sub>3</sub> at -23 °C</b>    |            |         |            |
| Se1—O3                                                                                        | 1.6316(10) | N2—O8   | 1.2522(16) |
| Se1—O4                                                                                        | 1.6200(13) | N2—O9   | 1.2540(16) |
| Se1—O1                                                                                        | 1.6282(11) | N2—O10  | 1.2498(16) |
| Se1—O2                                                                                        | 1.6411(10) | N3—O12A | 1.189(3)   |
| N1—O5A                                                                                        | 1.253(4)   | N3—O11A | 1.263(3)   |
| N1—O6A                                                                                        | 1.312(7)   | N3—O13A | 1.244(4)   |
| N1—O7A                                                                                        | 1.300(7)   | N3—O12B | 1.355(10)  |
| N1—O5B                                                                                        | 1.286(7)   | N3—O11B | 1.127(9)   |
| N1—O6B                                                                                        | 1.119(11)  | N3—O13B | 1.192(13)  |
| N1—O7B                                                                                        | 1.123(11)  |         |            |
| <b>(NH<sub>4</sub>)<sub>2</sub>SeO<sub>4</sub>·3NH<sub>4</sub>NO<sub>3</sub> at -73 °C</b>    |            |         |            |
| Se1—O3                                                                                        | 1.6279(17) | N2—O8   | 1.255(2)   |
| Se1—O4                                                                                        | 1.6326(14) | N2—O9   | 1.258(2)   |
| Se1—O1                                                                                        | 1.6331(15) | N2—O10  | 1.253(2)   |
| Se1—O2                                                                                        | 1.6467(14) | N3—O12  | 1.210(3)   |
| N1—O5                                                                                         | 1.225(3)   | N3—O11  | 1.242(3)   |
| N1—O6                                                                                         | 1.233(3)   | N3—O13  | 1.253(2)   |
| N1—O7                                                                                         | 1.257(3)   |         |            |
| <b>(NH<sub>4</sub>)<sub>2</sub>CrO<sub>4</sub>·3NH<sub>4</sub>NO<sub>3</sub> at -23 °C</b>    |            |         |            |
| Se1—O3                                                                                        | 1.6392(16) | N2—O8   | 1.253(2)   |
| Se1—O4                                                                                        | 1.631(2)   | N2—O9   | 1.255(2)   |
| Se1—O1                                                                                        | 1.6377(18) | N2—O10  | 1.253(2)   |
| Se1—O2                                                                                        | 1.6530(16) | N3—O12  | 1.201(3)   |
| N1—O5A                                                                                        | 1.162(18)  | N3—O11  | 1.243(3)   |
| N1—O6A                                                                                        | 1.344(11)  | N3—O13  | 1.250(3)   |
| N1—O7A                                                                                        | 1.246(9)   |         |            |
| N1—O5B                                                                                        | 1.31(2)    |         |            |
| N1—O6B                                                                                        | 1.056(19)  |         |            |
| N1—O7B                                                                                        | 1.281(10)  |         |            |
| <b>(NH<sub>4</sub>)<sub>2</sub>CrO<sub>4</sub>·3NH<sub>4</sub>NO<sub>3</sub> at -73 °C</b>    |            |         |            |
| Cr1—O4                                                                                        | 1.6337(15) | N2—O8   | 1.2556(19) |
| Cr1—O3                                                                                        | 1.6410(12) | N2—O9   | 1.2561(19) |
| Cr1—O1                                                                                        | 1.6418(13) | N2—O10  | 1.2524(19) |
| Cr1—O2                                                                                        | 1.6602(12) | N3—O12  | 1.215(2)   |
| N1—O5A                                                                                        | 1.133(9)   | N3—O11  | 1.246(2)   |
| N1—O6A                                                                                        | 1.313(9)   | N3—O13  | 1.252(2)   |
| N1—O7A                                                                                        | 1.253(5)   |         |            |
| N1—O5B                                                                                        | 1.370(10)  |         |            |
| N1—O6B                                                                                        | 1.106(16)  |         |            |

N1—O7B 1.284(7)

**(NH<sub>4</sub>)<sub>2</sub>CrO<sub>4</sub>·3NH<sub>4</sub>NO<sub>3</sub> at -123 °C**

|        |            |        |            |
|--------|------------|--------|------------|
| Cr1—O4 | 1.6357(15) | N2—O8  | 1.2575(19) |
| Cr1—O3 | 1.6391(13) | N2—O9  | 1.2539(19) |
| Cr1—O1 | 1.6441(13) | N2—O10 | 1.2545(19) |
| Cr1—O2 | 1.6629(12) | N3—O12 | 1.220(2)   |
| N1—O5A | 1.135(8)   | N3—O11 | 1.247(2)   |
| N1—O6A | 1.339(8)   | N3—O13 | 1.259(2)   |
| N1—O7A | 1.274(4)   |        |            |
| N1—O5B | 1.375(9)   |        |            |
| N1—O6B | 1.099(12)  |        |            |
| N1—O7B | 1.287(5)   |        |            |

**Table S5.** (NH<sub>4</sub>)<sub>2</sub>PO<sub>3</sub>F·NH<sub>4</sub>NO<sub>3</sub>-(I). Numerical details of hydrogen-bonding interactions at 22 °C and at -73 °C.

| <i>D</i> —H... <i>A</i>     | <i>D</i> —H | H... <i>A</i> | <i>D</i> ... <i>A</i> | <i>D</i> —H... <i>A</i> |
|-----------------------------|-------------|---------------|-----------------------|-------------------------|
| <b>22 °C</b>                |             |               |                       |                         |
| N2—H1...O3 <sup>i</sup>     | 0.90 (1)    | 1.93 (1)      | 2.8254 (15)           | 176 (2)                 |
| N2—H2...O1 <sup>ii</sup>    | 0.90 (1)    | 1.98 (1)      | 2.8354 (14)           | 158 (2)                 |
| N2—H3...O6 <sup>iii</sup>   | 0.90 (1)    | 2.18 (1)      | 2.9896 (18)           | 149 (2)                 |
| N2—H4...O1                  | 0.90 (1)    | 1.91 (1)      | 2.8052 (14)           | 174 (2)                 |
| N3—H5...O1                  | 0.90 (1)    | 1.94 (1)      | 2.8335 (15)           | 173 (2)                 |
| N3—H6...O3 <sup>iv</sup>    | 0.90 (1)    | 1.96 (1)      | 2.8431 (15)           | 167 (2)                 |
| N3—H7...O4 <sup>v</sup>     | 0.90 (1)    | 2.24 (2)      | 2.8407 (17)           | 124 (2)                 |
| N3—H8...O2 <sup>iii</sup>   | 0.90 (1)    | 1.96 (1)      | 2.8277 (15)           | 162 (2)                 |
| N4—H9...O4 <sup>vi</sup>    | 0.90 (1)    | 2.22 (1)      | 3.049 (3)             | 152 (2)                 |
| N4—H10...O5 <sup>vii</sup>  | 0.90 (1)    | 2.20 (1)      | 3.065 (3)             | 162 (2)                 |
| N4—H11...O3 <sup>viii</sup> | 0.90 (1)    | 1.93 (1)      | 2.8157 (19)           | 168 (2)                 |
| N4—H12...O2                 | 0.90 (1)    | 1.89 (1)      | 2.7779 (19)           | 168 (2)                 |
| <b>-73 °C</b>               |             |               |                       |                         |
| N2—H1...O3 <sup>i</sup>     | 0.90 (1)    | 1.93 (1)      | 2.8243 (10)           | 173 (1)                 |
| N2—H2...O1 <sup>ii</sup>    | 0.90 (1)    | 1.94 (1)      | 2.8099 (9)            | 161 (1)                 |
| N2—H3...O6 <sup>iii</sup>   | 0.90 (1)    | 2.19 (1)      | 2.9755 (11)           | 146 (1)                 |
| N2—H4...O1                  | 0.90 (1)    | 1.90 (1)      | 2.7965 (9)            | 172 (1)                 |
| N3—H5...O1                  | 0.90 (1)    | 1.93 (1)      | 2.8266 (10)           | 171 (1)                 |
| N3—H6...O3 <sup>iv</sup>    | 0.90 (1)    | 1.95 (1)      | 2.8311 (10)           | 168 (1)                 |
| N3—H7...O4 <sup>v</sup>     | 0.90 (1)    | 2.17 (1)      | 2.8509 (10)           | 132 (1)                 |
| N3—H8...O2 <sup>iii</sup>   | 0.90 (1)    | 1.92 (1)      | 2.7890 (10)           | 163 (1)                 |
| N4—H9...O4 <sup>vi</sup>    | 0.90 (1)    | 2.18 (1)      | 3.0200 (14)           | 156 (1)                 |
| N4—H10...O5 <sup>vii</sup>  | 0.90 (1)    | 2.16 (1)      | 3.0104 (15)           | 158 (1)                 |
| N4—H11...O3 <sup>viii</sup> | 0.90 (1)    | 1.92 (1)      | 2.8048 (11)           | 166 (1)                 |
| N4—H12...O2                 | 0.90 (1)    | 1.87 (1)      | 2.7624 (11)           | 169 (1)                 |

Symmetry codes: (i) *x*, *y*+1, *z*; (ii) *-x*+3/2, *y*+1/2, *-z*+3/2; (iii) *-x*+1, *-y*+1, *-z*+1; (iv) *-x*+1, *-y*, *-z*+1; (v) *x*+1, *y*, *z*; (vi) *-x*, *-y*, *-z*+1; (vii) *-x*, *-y*+1, *-z*+1; (viii) *-x*+1/2, *y*+1/2, *-z*+3/2.



**Table S6.** (NH<sub>4</sub>)<sub>2</sub>PO<sub>3</sub>F·NH<sub>4</sub>NO<sub>3</sub>-(II). Numerical details of hydrogen-bonding interactions at -98 °C.

| <i>D</i> —H... <i>A</i>       | <i>D</i> —H | H... <i>A</i> | <i>D</i> ... <i>A</i> | <i>D</i> —H... <i>A</i> |
|-------------------------------|-------------|---------------|-----------------------|-------------------------|
| N2A—H1A...O1A <sup>i</sup>    | 0.90 (1)    | 1.92 (1)      | 2.8071 (8)            | 170 (1)                 |
| N2A—H2A...O1B <sup>ii</sup>   | 0.90 (1)    | 1.98 (1)      | 2.8714 (8)            | 173 (1)                 |
| N2A—H3A...O5A <sup>iii</sup>  | 0.90 (1)    | 1.97 (1)      | 2.8514 (9)            | 166 (1)                 |
| N2A—H4A...O2A                 | 0.90 (1)    | 1.97 (1)      | 2.8622 (8)            | 172 (1)                 |
| N3A—H5A...O1A                 | 0.90 (1)    | 1.99 (1)      | 2.8878 (8)            | 178 (1)                 |
| N3A—H6A...O3A <sup>iv</sup>   | 0.90 (1)    | 1.93 (1)      | 2.8119 (8)            | 168 (1)                 |
| N3A—H7A...O6A <sup>v</sup>    | 0.90 (1)    | 1.94 (1)      | 2.8169 (8)            | 165 (1)                 |
| N3A—H8A...O2A <sup>iii</sup>  | 0.90 (1)    | 2.02 (1)      | 2.8694 (8)            | 156 (1)                 |
| N4A—H9A...O3B <sup>iv</sup>   | 0.90 (1)    | 1.93 (1)      | 2.8056 (8)            | 163 (1)                 |
| N4A—H10A...O6A                | 0.90 (1)    | 1.97 (1)      | 2.8649 (9)            | 175 (1)                 |
| N4A—H11A...O2B <sup>iii</sup> | 0.90 (1)    | 2.02 (1)      | 2.8891 (8)            | 163 (1)                 |
| N4A—H12A...O3A                | 0.90 (1)    | 1.93 (1)      | 2.8164 (8)            | 170 (1)                 |
| N2B—H1B...O3B <sup>i</sup>    | 0.90 (1)    | 1.94 (1)      | 2.8288 (8)            | 170 (1)                 |
| N2B—H2B...O1A <sup>ii</sup>   | 0.90 (1)    | 1.92 (1)      | 2.7890 (8)            | 163 (1)                 |
| N2B—H3B...O4B <sup>ii</sup>   | 0.90 (1)    | 2.14 (1)      | 2.9414 (9)            | 149 (1)                 |
| N2B—H4B...O1B                 | 0.90 (1)    | 1.89 (1)      | 2.7845 (8)            | 173 (1)                 |
| N3B—H5B...O1B <sup>vi</sup>   | 0.90 (1)    | 1.96 (1)      | 2.8589 (8)            | 174 (1)                 |
| N3B—H6B...O3B <sup>i</sup>    | 0.90 (1)    | 1.94 (1)      | 2.8190 (8)            | 167 (1)                 |
| N3B—H7B...O5B                 | 0.90 (1)    | 2.14 (1)      | 2.8467 (8)            | 134 (1)                 |
| N3B—H7B...O4B <sup>vii</sup>  | 0.90 (1)    | 2.33 (1)      | 2.9010 (8)            | 122 (1)                 |
| N3B—H8B...O2B                 | 0.90 (1)    | 1.98 (1)      | 2.8422 (8)            | 161 (1)                 |
| N4B—H9B...O5B <sup>viii</sup> | 0.90 (1)    | 2.22 (1)      | 3.0515 (11)           | 154 (1)                 |
| N4B—H10B...O6B <sup>iii</sup> | 0.90 (1)    | 2.16 (1)      | 2.9738 (12)           | 150 (1)                 |
| N4B—H11B...O2A <sup>iii</sup> | 0.90 (1)    | 1.90 (1)      | 2.7802 (10)           | 166 (1)                 |
| N4B—H12B...O2B                | 0.90 (1)    | 1.91 (1)      | 2.8012 (9)            | 169 (1)                 |

Symmetry codes: (i)  $x, y+1, z$ ; (ii)  $-x+2, -y+1, -z+1$ ; (iii)  $-x+1, -y+1, -z+1$ ; (iv)  $-x+1, -y, -z+1$ ; (v)  $x+1, y, z$ ; (vi)  $-x+2, -y+1, -z$ ; (vii)  $x, y+1, z-1$ ; (viii)  $x, y-1, z$ .

**Table S7.** (NH<sub>4</sub>)<sub>2</sub>PO<sub>3</sub>F·NH<sub>4</sub>NO<sub>3</sub>-(III). Numerical details of hydrogen-bonding interactions at -173 °C.

| <i>D</i> —H... <i>A</i>    | <i>D</i> —H | H... <i>A</i> | <i>D</i> ... <i>A</i> | <i>D</i> —H... <i>A</i> |
|----------------------------|-------------|---------------|-----------------------|-------------------------|
| N2—H1...O3 <sup>i</sup>    | 0.90 (1)    | 1.97 (1)      | 2.8611 (10)           | 173 (1)                 |
| N2—H2...O1 <sup>ii</sup>   | 0.90 (1)    | 1.98 (1)      | 2.8720 (9)            | 174 (1)                 |
| N2—H3...O5 <sup>iii</sup>  | 0.90 (1)    | 1.96 (1)      | 2.8505 (10)           | 170 (1)                 |
| N2—H4...O1                 | 0.90 (1)    | 1.89 (1)      | 2.7811 (10)           | 173 (1)                 |
| N3—H5...O1                 | 0.90 (1)    | 2.05 (1)      | 2.9446 (9)            | 177 (1)                 |
| N3—H6...O3 <sup>iv</sup>   | 0.90 (1)    | 1.99 (1)      | 2.8551 (9)            | 161 (1)                 |
| N3—H7...O6 <sup>v</sup>    | 0.90 (1)    | 1.90 (1)      | 2.7800 (10)           | 165 (1)                 |
| N3—H8...O2 <sup>iii</sup>  | 0.90 (1)    | 1.96 (1)      | 2.8347 (9)            | 163 (1)                 |
| N4—H9...O2 <sup>vi</sup>   | 0.90 (1)    | 1.96 (1)      | 2.8328 (9)            | 164 (1)                 |
| N4—H10...O6                | 0.90 (1)    | 1.93 (1)      | 2.8250 (10)           | 178 (1)                 |
| N4—H11...O3 <sup>vii</sup> | 0.90 (1)    | 1.91 (1)      | 2.7841 (9)            | 163 (1)                 |
| N4—H12...O2                | 0.90 (1)    | 1.97 (1)      | 2.8508 (10)           | 168 (1)                 |

Symmetry codes: (i)  $x, y+1, z$ ; (ii)  $-x+3/2, y+1/2, -z+3/2$ ; (iii)  $-x+1, -y+1, -z+1$ ; (iv)  $-x+1, -y, -z+1$ ; (v)  $x+1, y, z$ ; (vi)  $-x+1/2, y-1/2, -z+3/2$ ; (vii)  $-x+1/2, y+1/2, -z+3/2$ .

**Table S8.** Complexity parameters calculated with the *crystIT* program

|                                                                                          |                                              |                                              | positions                                   |                                                 | Coordinatorial                       |                                               |                                             |
|------------------------------------------------------------------------------------------|----------------------------------------------|----------------------------------------------|---------------------------------------------|-------------------------------------------------|--------------------------------------|-----------------------------------------------|---------------------------------------------|
|                                                                                          | atoms per<br>unit cell                       | atoms per<br>reduced<br>unit cell            | per<br>reduced<br>unit cell                 | unique<br>species                               | degrees of<br>freedom (arity<br>sum) | I_comb in<br>bit/position                     | I_comb_max<br>in bit/position               |
| (NH <sub>4</sub> ) <sub>2</sub> PO <sub>3</sub> F·NH <sub>4</sub> NO <sub>3</sub> -(I)   | 96                                           | 96                                           | 96                                          | 24                                              | 72                                   | 4.584963                                      | 4.584963                                    |
| (NH <sub>4</sub> ) <sub>2</sub> PO <sub>3</sub> F·NH <sub>4</sub> NO <sub>3</sub> -(II)  | 96                                           | 96                                           | 96                                          | 48                                              | 144                                  | 5.584963                                      | 5.584963                                    |
| (NH <sub>4</sub> ) <sub>2</sub> PO <sub>3</sub> F·NH <sub>4</sub> NO <sub>3</sub> -(III) | 96                                           | 96                                           | 96                                          | 24                                              | 72                                   | 4.584963                                      | 4.584963                                    |
| (NH <sub>4</sub> ) <sub>2</sub> SeO <sub>4</sub> ·3NH <sub>4</sub> NO <sub>3</sub> -(I)  | 84                                           | 84                                           | 90                                          | 51                                              | 135                                  | 5.600861                                      | 5.672425                                    |
| (NH <sub>4</sub> ) <sub>2</sub> SeO <sub>4</sub> ·3NH <sub>4</sub> NO <sub>3</sub> -(II) | 168                                          | 168                                          | 168                                         | 42                                              | 126                                  | 5.392317                                      | 5.392317                                    |
| (NH <sub>4</sub> ) <sub>2</sub> CrO <sub>4</sub> ·3NH <sub>4</sub> NO <sub>3</sub> -(I)  | 84                                           | 84                                           | 90                                          | 51                                              | 135                                  | 5.610320                                      | 5.672425                                    |
| (NH <sub>4</sub> ) <sub>2</sub> CrO <sub>4</sub> ·3NH <sub>4</sub> NO <sub>3</sub> -(II) | 168                                          | 168                                          | 180                                         | 51                                              | 135                                  | 5.624767                                      | 5.672425                                    |
|                                                                                          | I_comb_norm                                  | I_comb_tot<br>in<br>bit/reduced<br>unit cell |                                             | I_comb_density<br>in bit/Å <sup>3</sup>         |                                      | I_coor in<br>bit/freedom                      | I_coor_max<br>in<br>bit/freedom             |
| (NH <sub>4</sub> ) <sub>2</sub> PO <sub>3</sub> F·NH <sub>4</sub> NO <sub>3</sub> -(I)   | 1.000000                                     | 440.156400                                   |                                             | 0.502589                                        |                                      | 4.584963                                      | 4.584963                                    |
| (NH <sub>4</sub> ) <sub>2</sub> PO <sub>3</sub> F·NH <sub>4</sub> NO <sub>3</sub> -(II)  | 1.000000                                     | 536.156400                                   |                                             | 0.610669                                        |                                      | 5.584963                                      | 5.584963                                    |
| (NH <sub>4</sub> ) <sub>2</sub> PO <sub>3</sub> F·NH <sub>4</sub> NO <sub>3</sub> -(III) | 1.000000                                     | 440.156400                                   |                                             | 0.495406                                        |                                      | 4.584963                                      | 4.584963                                    |
| (NH <sub>4</sub> ) <sub>2</sub> SeO <sub>4</sub> ·3NH <sub>4</sub> NO <sub>3</sub> -(I)  | 0.987384                                     | 504.077458                                   |                                             | 0.661946                                        |                                      | 5.491853                                      | 5.491853                                    |
| (NH <sub>4</sub> ) <sub>2</sub> SeO <sub>4</sub> ·3NH <sub>4</sub> NO <sub>3</sub> -(II) | 1.000000                                     | 905.909327                                   |                                             | 0.612742                                        |                                      | 5.392317                                      | 5.392317                                    |
| (NH <sub>4</sub> ) <sub>2</sub> CrO <sub>4</sub> ·3NH <sub>4</sub> NO <sub>3</sub> -(I)  | 0.989051                                     | 504.928803                                   |                                             | 0.671452                                        |                                      | 5.491853                                      | 5.491853                                    |
| (NH <sub>4</sub> ) <sub>2</sub> CrO <sub>4</sub> ·3NH <sub>4</sub> NO <sub>3</sub> -(II) | 0.991598                                     | 1012.458090                                  |                                             | 0.694099                                        |                                      | 5.491853                                      | 5.491853                                    |
|                                                                                          | I_coor_tot<br>in<br>bit/reduced<br>unit cell | I_coor_<br>density in<br>bit/Å <sup>3</sup>  | I_conf<br>in<br>bit/(position +<br>freedom) | I_conf_max<br>in<br>bit/(position +<br>freedom) | I_conf_norm                          | I_conf_tot<br>in bit/<br>reduced unit<br>cell | I_conf_<br>density in<br>bit/Å <sup>3</sup> |
| (NH <sub>4</sub> ) <sub>2</sub> PO <sub>3</sub> F·NH <sub>4</sub> NO <sub>3</sub> -(I)   | 330.1173                                     | 0.376942                                     | 5.570191                                    | 5.584963                                        | 0.997355                             | 935.792027                                    | 1.068527                                    |
| (NH <sub>4</sub> ) <sub>2</sub> PO <sub>3</sub> F·NH <sub>4</sub> NO <sub>3</sub> -(II)  | 804.2346                                     | 0.916003                                     | 6.555913                                    | 6.584963                                        | 0.995589                             | 1573.419143                                   | 1.792084                                    |
| (NH <sub>4</sub> ) <sub>2</sub> PO <sub>3</sub> F·NH <sub>4</sub> NO <sub>3</sub> -(III) | 330.1173                                     | 0.371554                                     | 5.570191                                    | 5.584963                                        | 0.997355                             | 935.792027                                    | 1.053255                                    |
| (NH <sub>4</sub> ) <sub>2</sub> SeO <sub>4</sub> ·3NH <sub>4</sub> NO <sub>3</sub> -(I)  | 741.4002                                     | 0.973595                                     | 6.506407                                    | 6.584963                                        | 0.988070                             | 1463.941510                                   | 1.922424                                    |
| (NH <sub>4</sub> ) <sub>2</sub> SeO <sub>4</sub> ·3NH <sub>4</sub> NO <sub>3</sub> -(II) | 679.4320                                     | 0.459557                                     | 6.377546                                    | 6.392317                                        | 0.997689                             | 1874.998394                                   | 1.268218                                    |
| (NH <sub>4</sub> ) <sub>2</sub> CrO <sub>4</sub> ·3NH <sub>4</sub> NO <sub>3</sub> -(I)  | 741.4002                                     | 0.985911                                     | 6.510190                                    | 6.584963                                        | 0.988645                             | 1464.792855                                   | 1.947875                                    |
| (NH <sub>4</sub> ) <sub>2</sub> CrO <sub>4</sub> ·3NH <sub>4</sub> NO <sub>3</sub> -(II) | 741.4002                                     | 0.508273                                     | 6.553032                                    | 6.584963                                        | 0.995151                             | 2064.205121                                   | 1.415133                                    |

Definitions of parameters given in Kaußler, C.; Kieslich, G. *crystIT*: complexity and configurational [entropy](#) of crystal structures via information theory. *J. Appl. Crystallogr.* **2021**, *54*, 306-316.

**Table S9.** Absolute atomic displacements ( $|u|$  / Å) of the pair  $(\text{NH}_4)_2\text{PO}_3\text{F}\cdot\text{NH}_4\text{NO}_3$ -(I) and -(III), and of  $(\text{NH}_4)_2\text{XO}_4\cdot 3\text{NH}_4\text{NO}_3$  crystal structures in space group  $P2_1$  (reference structure  $(\text{NH}_4)_2\text{SO}_4\cdot 3\text{NH}_4\text{NO}_3$ ), as well as their lattice distortion ( $S$ ), arithmetic mean distance  $d_{\text{av}}$  / Å and measure of similarity ( $\delta$ ). For all calculations, H atoms in the crystal structures were not considered for comparison; for the disordered nitrate group in the  $(\text{NH}_4)_2\text{XO}_4\cdot 3\text{NH}_4\text{NO}_3$  structures, only atoms of the major orientation were taken into account.

| $(\text{NH}_4)_2\text{PO}_3\text{F}\cdot\text{NH}_4\text{NO}_3$ -(I) and -(III) |        |           | $(\text{NH}_4)_2\text{XO}_4\cdot 3\text{NH}_4\text{NO}_3$ |                      |
|---------------------------------------------------------------------------------|--------|-----------|-----------------------------------------------------------|----------------------|
| Atom pair                                                                       | $ u $  | Atom pair | $ u $ / Å for X = Se                                      | $ u $ / Å for X = Cr |
| O3                                                                              | 0.1290 | O13       | 0.0126                                                    | 0.0445               |
| O1                                                                              | 0.1352 | O11       | 0.0280                                                    | 0.1368               |
| P1                                                                              | 0.1361 | O10       | 0.0270                                                    | 0.1476               |
| O2                                                                              | 0.1629 | X1        | 0.0308                                                    | 0.1026               |
| N3                                                                              | 0.1746 | O9        | 0.0361                                                    | 0.1007               |
| N2                                                                              | 0.2866 | N2        | 0.0374                                                    | 0.0425               |
| F1                                                                              | 0.2967 | N1        | 0.0407                                                    | 0.0915               |
| N4                                                                              | 0.5936 | N8        | 0.0429                                                    | 0.0247               |
| N1                                                                              | 0.8871 | O8        | 0.0473                                                    | 0.1173               |
| O4                                                                              | 1.0942 | N3        | 0.0544                                                    | 0.1467               |
| O5                                                                              | 1.3640 | O12       | 0.0516                                                    | 0.2149               |
| O6                                                                              | 2.3975 | O7        | 0.0559                                                    | 0.1561               |
|                                                                                 |        | N4        | 0.0711                                                    | 0.0703               |
|                                                                                 |        | N6        | 0.0709                                                    | 0.0442               |
|                                                                                 |        | N7        | 0.0760                                                    | 0.0726               |
|                                                                                 |        | O6        | 0.0845                                                    | 0.1435               |
|                                                                                 |        | N5        | 0.1039                                                    | 0.2391               |
|                                                                                 |        | O1        | 0.1182                                                    | 0.2207               |
|                                                                                 |        | O5        | 0.1353                                                    | 0.2547               |
|                                                                                 |        | O3        | 0.1526                                                    | 0.1871               |
|                                                                                 |        | O2        | 0.1530                                                    | 0.1720               |
|                                                                                 |        | O4        | 0.1704                                                    | 0.3629               |
| S                                                                               | 0.0238 |           | 0.0074                                                    | 0.0056               |
| $d_{\text{av.}}$ (Å)                                                            | 0.6381 |           | 0.0728                                                    | 0.1406               |
| $\delta$                                                                        | 0.280  |           | 0.014                                                     | 0.092                |

**Table S10.** (NH<sub>4</sub>)<sub>2</sub>SeO<sub>4</sub>·3NH<sub>4</sub>NO<sub>3</sub>-(I). Numerical details of hydrogen-bonding interactions at 50 °C.

| <i>D</i> —H... <i>A</i>     | <i>D</i> —H | H... <i>A</i> | <i>D</i> ... <i>A</i> | <i>D</i> —H... <i>A</i> |
|-----------------------------|-------------|---------------|-----------------------|-------------------------|
| N4—H4A...O2 <sup>i</sup>    | 0.95        | 1.91          | 2.840 (4)             | 167                     |
| N4—H4B...O13A               | 0.87        | 2.37          | 3.190 (7)             | 156                     |
| N4—H4B...O13B               | 0.87        | 2.16          | 2.92 (2)              | 146                     |
| N4—H4C...O7                 | 0.98        | 2.39          | 3.083 (5)             | 128                     |
| N4—H4C...O8 <sup>ii</sup>   | 0.98        | 2.18          | 3.007 (5)             | 141                     |
| N4—H4D...O12B <sup>i</sup>  | 0.82        | 2.47          | 3.096 (18)            | 134                     |
| N5—H5A...O4 <sup>i</sup>    | 0.95        | 1.79          | 2.721 (4)             | 165                     |
| N5—H5B...O6 <sup>ii</sup>   | 0.98        | 2.27          | 2.994 (6)             | 130                     |
| N5—H5C...O7 <sup>i</sup>    | 0.92        | 2.18          | 2.965 (6)             | 144                     |
| N5—H5D...O13A               | 0.95        | 2.03          | 2.973 (6)             | 173                     |
| N6—H6A...O4                 | 0.96        | 2.10          | 3.027 (6)             | 162                     |
| N6—H6B...O1 <sup>iii</sup>  | 0.98        | 1.93          | 2.891 (5)             | 165                     |
| N6—H6C...O6 <sup>iv</sup>   | 0.93        | 2.20          | 3.017 (6)             | 145                     |
| N6—H6D...O5                 | 0.78        | 2.46          | 3.159 (5)             | 150                     |
| N6—H6D...O11A               | 0.78        | 2.48          | 3.006 (5)             | 126                     |
| N7—H7A...O2 <sup>vi</sup>   | 0.98        | 2.01          | 2.916 (3)             | 154                     |
| N7—H7B...O1 <sup>iii</sup>  | 1.03        | 2.26          | 3.193 (6)             | 150                     |
| N7—H7B...O2 <sup>iii</sup>  | 1.03        | 2.16          | 2.997 (8)             | 137                     |
| N7—H7C...O3                 | 0.85        | 2.18          | 2.957 (6)             | 151                     |
| N7—H7D...O8                 | 0.87        | 2.27          | 2.973 (5)             | 137                     |
| N7—H7D...O9                 | 0.87        | 2.33          | 2.996 (5)             | 134                     |
| N8—H8A...O3 <sup>vi</sup>   | 0.91        | 2.14          | 2.925 (4)             | 144                     |
| N8—H8B...O1 <sup>vii</sup>  | 0.94        | 2.09          | 3.001 (5)             | 161                     |
| N8—H8C...O10 <sup>iii</sup> | 0.92        | 2.16          | 3.069 (5)             | 167                     |
| N8—H8D...O8                 | 0.96        | 2.11          | 3.008 (5)             | 154                     |

Symmetry codes: (i)  $-x+2, y-1/2, -z+1$ ; (ii)  $-x+2, y+1/2, -z+1$ ; (iii)  $x, y-1, z$ ; (iv)  $-x+1, y+1/2, -z+1$ ; (v)  $x-1, y, z$ ; (vi)  $-x+2, y-1/2, -z+2$ ; (vii)  $x+1, y-1, z$ .

**Table S11.** (NH<sub>4</sub>)<sub>2</sub>SeO<sub>4</sub>·3NH<sub>4</sub>NO<sub>3</sub>-(II). Numerical details of hydrogen-bonding interactions at -173 °C.

| <i>D</i> —H... <i>A</i>     | <i>D</i> —H | H... <i>A</i> | <i>D</i> ... <i>A</i> | <i>D</i> —H... <i>A</i> |
|-----------------------------|-------------|---------------|-----------------------|-------------------------|
| N4—H4A...O13 <sup>i</sup>   | 0.88 (1)    | 2.12 (1)      | 2.9373 (12)           | 155 (2)                 |
| N4—H4B...O12 <sup>ii</sup>  | 0.88 (1)    | 2.37 (1)      | 3.0097 (13)           | 131 (1)                 |
| N4—H4B...O13 <sup>iii</sup> | 0.88 (1)    | 2.29 (1)      | 3.0332 (12)           | 143 (1)                 |
| N4—H4C...O7                 | 0.88 (1)    | 2.12 (1)      | 2.9133 (12)           | 149 (2)                 |
| N4—H4D...O2 <sup>ii</sup>   | 0.89 (1)    | 1.92 (1)      | 2.8052 (11)           | 172 (2)                 |
| N5—H5A...O6 <sup>iv</sup>   | 0.89 (1)    | 2.10 (1)      | 2.8903 (12)           | 149 (1)                 |
| N5—H5B...O4 <sup>v</sup>    | 0.88 (1)    | 1.90 (1)      | 2.7654 (11)           | 168 (2)                 |
| N5—H5C...O13 <sup>vi</sup>  | 0.89 (1)    | 2.02 (1)      | 2.8969 (12)           | 168 (2)                 |
| N5—H5D...O7 <sup>v</sup>    | 0.88 (1)    | 2.05 (1)      | 2.9116 (12)           | 166 (2)                 |
| N6—H6A...O4                 | 0.88 (1)    | 2.02 (1)      | 2.8977 (11)           | 172 (2)                 |
| N6—H6B...O1 <sup>iii</sup>  | 0.88 (1)    | 1.95 (1)      | 2.8122 (11)           | 167 (2)                 |
| N6—H6C...O6 <sup>iv</sup>   | 0.89 (1)    | 2.35 (2)      | 2.9186 (12)           | 122 (1)                 |
| N6—H6C...O10                | 0.89 (1)    | 2.26 (1)      | 3.0504 (11)           | 148 (2)                 |
| N6—H6D...O5                 | 0.88 (1)    | 2.39 (1)      | 3.1036 (12)           | 139 (1)                 |
| N6—H6D...O5 <sup>v</sup>    | 0.88 (1)    | 2.44 (1)      | 3.0939 (12)           | 132 (1)                 |
| N7—H7A...O2 <sup>iii</sup>  | 0.88 (1)    | 1.99 (1)      | 2.8663 (11)           | 171 (2)                 |
| N7—H7B...O9 <sup>vii</sup>  | 0.89 (1)    | 2.14 (1)      | 2.9551 (12)           | 152 (2)                 |
| N7—H7C...O3                 | 0.89 (1)    | 1.93 (1)      | 2.8202 (11)           | 173 (2)                 |
| N7—H7D...O2 <sup>viii</sup> | 0.90 (1)    | 2.00 (1)      | 2.8718 (11)           | 166 (2)                 |
| N8—H8A...O10                | 0.89 (1)    | 2.15 (1)      | 2.9772 (12)           | 154 (2)                 |
| N8—H8B...O3 <sup>ix</sup>   | 0.89 (1)    | 2.33 (2)      | 2.9699 (11)           | 129 (1)                 |
| N8—H8B...O10 <sup>ix</sup>  | 0.89 (1)    | 2.46 (2)      | 3.1260 (12)           | 132 (1)                 |
| N8—H8C...O8 <sup>x</sup>    | 0.90 (1)    | 1.97 (1)      | 2.8643 (12)           | 174 (2)                 |
| N8—H8D...O1                 | 0.89 (1)    | 1.98 (1)      | 2.8650 (12)           | 172 (2)                 |

Symmetry codes: (i)  $-x+2, y-3/2, -z+3/2$ ; (ii)  $-x+2, y-1/2, -z+3/2$ ; (iii)  $x, y-1, z$ ; (iv)  $-x+1, y+1/2, -z+3/2$ ; (v)  $-x+1, y-1/2, -z+3/2$ ; (vi)  $x-1, y-1, z$ ; (vii)  $x+1, y, z$ ; (viii)  $-x+2, -y+1, -z+2$ ; (ix)  $-x+1, -y+1, -z+2$ ; (x)  $x, y+1, z$ .

**Table S12.** (NH<sub>4</sub>)<sub>2</sub>CrO<sub>4</sub>·3NH<sub>4</sub>NO<sub>3</sub>-(I). Numerical details of hydrogen-bonding interactions at 60 °C.

| <i>D</i> —H... <i>A</i>    | <i>D</i> —H | H... <i>A</i> | <i>D</i> ... <i>A</i> | <i>D</i> —H... <i>A</i> |
|----------------------------|-------------|---------------|-----------------------|-------------------------|
| N4—H4A...O2 <sup>i</sup>   | 0.95        | 1.88          | 2.804 (5)             | 166                     |
| N4—H4B...O13A              | 0.87        | 2.47          | 3.286 (13)            | 157                     |
| N4—H4B...O13B              | 0.87        | 2.23          | 3.03 (3)              | 153                     |
| N4—H4C...O7                | 0.97        | 2.39          | 3.098 (9)             | 129                     |
| N4—H4C...O8 <sup>ii</sup>  | 0.97        | 2.16          | 2.974 (10)            | 141                     |
| N4—H4D...O9 <sup>i</sup>   | 0.82        | 2.48          | 3.072 (10)            | 131                     |
| N5—H5A...O4 <sup>i</sup>   | 0.95        | 1.79          | 2.735 (6)             | 174                     |
| N5—H5B...O6 <sup>ii</sup>  | 0.97        | 2.25          | 2.983 (12)            | 131                     |
| N5—H5C...O7 <sup>i</sup>   | 0.91        | 2.16          | 2.920 (11)            | 141                     |
| N5—H5C...O11A <sup>i</sup> | 0.91        | 2.43          | 3.074 (19)            | 128                     |
| N5—H5D...O13A              | 0.94        | 2.02          | 2.965 (13)            | 179                     |
| N5—H5D...O13B              | 0.94        | 2.34          | 3.28 (3)              | 173                     |
| N6—H6A...O3                | 0.95        | 2.25          | 2.877 (10)            | 123                     |
| N6—H6A...O4                | 0.95        | 2.44          | 3.345 (15)            | 158                     |
| N6—H6B...O1 <sup>iv</sup>  | 0.97        | 1.91          | 2.853 (10)            | 162                     |
| N6—H6C...O6 <sup>v</sup>   | 0.93        | 2.17          | 2.990 (12)            | 146                     |
| N6—H6D...O5                | 0.78        | 2.61          | 3.292 (8)             | 148                     |
| N6—H6D...O11A              | 0.78        | 2.46          | 3.019 (9)             | 130                     |
| N7—H7A...O2 <sup>vii</sup> | 0.98        | 1.95          | 2.855 (5)             | 153                     |
| N7—H7B...O1 <sup>iv</sup>  | 1.03        | 2.12          | 3.047 (10)            | 150                     |
| N7—H7B...O2 <sup>iv</sup>  | 1.03        | 2.22          | 3.032 (15)            | 135                     |
| N7—H7C...O2                | 0.85        | 2.45          | 3.100 (16)            | 134                     |
| N7—H7C...O3                | 0.85        | 2.23          | 2.988 (10)            | 149                     |
| N7—H7D...O8                | 0.87        | 2.35          | 3.019 (9)             | 134                     |
| N7—H7D...O9                | 0.87        | 2.28          | 2.974 (8)             | 137                     |
| N8—H8A...O3 <sup>vii</sup> | 0.91        | 2.17          | 2.958 (8)             | 145                     |
| N8—H8B...O1 <sup>ix</sup>  | 0.94        | 2.13          | 3.027 (8)             | 159                     |
| N8—H8C...O10 <sup>iv</sup> | 0.92        | 2.26          | 3.164 (14)            | 168                     |
| N8—H8D...O8                | 0.96        | 2.09          | 2.971 (10)            | 152                     |

Symmetry codes: (i)  $-x+2, y-1/2, -z+1$ ; (ii)  $-x+2, y+1/2, -z+1$ ; (iii)  $x+1, y, z$ ; (iv)  $x, y-1, z$ ; (v)  $-x+1, y+1/2, -z+1$ ; (vi)  $x-1, y, z$ ; (vii)  $-x+2, y-1/2, -z+2$ ; (viii)  $-x+2, y-3/2, -z+2$ ; (ix)  $x+1, y-1, z$ .

**Table S13.** (NH<sub>4</sub>)<sub>2</sub>CrO<sub>4</sub>·3NH<sub>4</sub>NO<sub>3</sub>-(II). Numerical details of hydrogen-bonding interactions at −173 °C

| <i>D</i> —H... <i>A</i>     | <i>D</i> —H | H... <i>A</i> | <i>D</i> ... <i>A</i> | <i>D</i> —H... <i>A</i> |
|-----------------------------|-------------|---------------|-----------------------|-------------------------|
| N4—H4A...O12 <sup>i</sup>   | 0.88 (1)    | 2.21 (2)      | 2.999 (2)             | 148 (3)                 |
| N4—H4B...O2 <sup>i</sup>    | 0.89 (1)    | 1.88 (1)      | 2.774 (2)             | 173 (3)                 |
| N4—H4C...O6A                | 0.88 (1)    | 2.19 (2)      | 2.923 (6)             | 140 (3)                 |
| N4—H4C...O5B                | 0.88 (1)    | 2.18 (2)      | 2.951 (6)             | 145 (3)                 |
| N4—H4D...O13 <sup>iii</sup> | 0.89 (1)    | 2.05 (1)      | 2.927 (2)             | 171 (3)                 |
| N5—H5A...O5A <sup>iv</sup>  | 0.89 (1)    | 2.09 (2)      | 2.848 (7)             | 143 (3)                 |
| N5—H5A...O7B <sup>iv</sup>  | 0.89 (1)    | 2.23 (1)      | 3.113 (4)             | 171 (3)                 |
| N5—H5B...O6A <sup>v</sup>   | 0.89 (1)    | 2.09 (2)      | 2.937 (6)             | 158 (3)                 |
| N5—H5B...O6B <sup>v</sup>   | 0.89 (1)    | 1.99 (2)      | 2.851 (5)             | 162 (3)                 |
| N5—H5C...O4 <sup>v</sup>    | 0.90 (1)    | 1.85 (1)      | 2.741 (2)             | 172 (3)                 |
| N5—H5D...O13 <sup>vi</sup>  | 0.89 (1)    | 2.06 (1)      | 2.942 (2)             | 169 (3)                 |
| N6—H6A...O4                 | 0.89 (1)    | 2.06 (1)      | 2.941 (2)             | 177 (3)                 |
| N6—H6B...O5A <sup>iv</sup>  | 0.89 (1)    | 2.13 (2)      | 2.833 (7)             | 136 (3)                 |
| N6—H6B...O5B <sup>iv</sup>  | 0.89 (1)    | 2.26 (2)      | 3.051 (6)             | 148 (3)                 |
| N6—H6C...O7B                | 0.88 (1)    | 2.32 (2)      | 3.154 (3)             | 159 (3)                 |
| N6—H6D...O1 <sup>ii</sup>   | 0.89 (1)    | 1.95 (1)      | 2.836 (2)             | 178 (3)                 |
| N7—H7A...O2 <sup>vii</sup>  | 0.90 (1)    | 1.98 (2)      | 2.834 (2)             | 159 (3)                 |
| N7—H7B...O9 <sup>viii</sup> | 0.90 (1)    | 2.11 (2)      | 2.911 (2)             | 148 (3)                 |
| N7—H7C...O2 <sup>ii</sup>   | 0.89 (1)    | 2.02 (1)      | 2.881 (2)             | 163 (3)                 |
| N7—H7D...O3                 | 0.90 (1)    | 1.99 (1)      | 2.871 (2)             | 167 (3)                 |
| N8—H8A...O1                 | 0.90 (1)    | 1.98 (1)      | 2.874 (2)             | 171 (3)                 |
| N8—H8B...O8 <sup>ix</sup>   | 0.90 (1)    | 1.99 (1)      | 2.885 (2)             | 171 (3)                 |
| N8—H8C...O3 <sup>xi</sup>   | 0.90 (1)    | 2.28 (2)      | 2.964 (2)             | 133 (2)                 |
| N8—H8C...O10 <sup>xi</sup>  | 0.90 (1)    | 2.56 (3)      | 3.114 (2)             | 121 (2)                 |
| N8—H8D...O10                | 0.90 (1)    | 2.07 (1)      | 2.935 (2)             | 160 (3)                 |

Symmetry codes: (i)  $-x+2, y-1/2, -z+3/2$ ; (ii)  $x, y-1, z$ ; (iii)  $-x+2, y-3/2, -z+3/2$ ; (iv)  $-x+1, y+1/2, -z+3/2$ ; (v)  $-x+1, y-1/2, -z+3/2$ ; (vi)  $x-1, y-1, z$ ; (vii)  $-x+2, -y+1, -z+2$ ; (viii)  $x+1, y, z$ ; (ix)  $x, y+1, z$ ; (x)  $-x+1, -y+2, -z+2$ ; (xi)  $-x+1, -y+1, -z+2$ .
